# Supplementary material for: Multiple NTS neuron populations cumulatively suppress food intake
Source: eLife. 2023 Dec 7;12:e85640. doi: 10.7554/eLife.85640 (PMC10781422; doi:10.7554/eLife.85640)
Supplement: Figure 1—figure supplement 1—source data 1. [file elife-85640-fig1-figsupp1-data1.xlsx]

## Sheet: Sheet1
Figure 1 Figure Supplement 1B
		Veh						CNO
2		0.5	0.2	0.4	0.2	0.5	0.3	0.4	0.6	0.5	0.7	0.3	0.4
4		0.9	0.8	0.8	0.8	1.2	1	0.8	0.9	0.8	0.9	0.8	1.1
Figure 1 Figure Supplement 1C
		Veh						CNO
0		0	0	0	0	0	0	0	0	0	0	0	0
1		1.1	0.9	1.1	0.4	1.1	1.2	1	1.6	1	1.5	1.3	1
2		1.3	1.9	1.3	1.2	1.5	1.3	1.4	1.6	1.3	1.5	1.3	1.2
4		2.1	2.1	1.9	1.6	1.8	1.9	1.8	2.2	1.9	2.2	1.7	1.7
6		2.6	3.1	2.5	2.4	2.2	2.7	2.4	2.8	2.8	2.8	2.2	2.8
Figure 1 Figure Supplement 1D
		Veh						CNO
0		0	0	0	0	0	0	0	0	0	0	0	0
1		1.2	0.8	1	0.8	0.5	0.7	1.8	1	1.3	1	1	0.7
2		1.4	0.9	1.4	1.1	0.6	0.7	1.9	1.5	1.3	1.5	1.2	0.9
4		2	1.3	1.6	1.5	1.1	1.2	2.4	2.2	1.9	2.2	1.4	1.6
6		2.7	1.9	2.7	2.5	1.8	2.2	3.3	3.1	3.2	3.1	2.2	2.2
Figure 1 Figure Supplement 1E
		Veh						CNO
0		0	0	0	0	0	0	0	0	0	0	0	0
1		1	1.3	1.5	1.6	1.2	1.4	1.5	1.6	1.5	1.8	1.5	1.6
2		1.1	1.6	1.7	1.6	1.6	1.6	1.9	1.8	1.9	2.1	2	1.9
4		1.5	1.9	2	2.1	1.9	2	2.4	2.3	2.7	2.6	2.5	2.2
6		2.1	2.5	2.6	2.7	2.5	2.4	3	2.9	3.1	3.2	2.9	3.1
