# Supplementary material for: Multiple NTS neuron populations cumulatively suppress food intake
Source: eLife. 2023 Dec 7;12:e85640. doi: 10.7554/eLife.85640 (PMC10781422; doi:10.7554/eLife.85640)
Supplement: Figure 1—source data 1. [file elife-85640-fig1-data1.xlsx]

## Sheet: Sheet1
Figure 1B
Time	Veh																										Calcr
0h	0	0	0	0	0	0	0	0	0	0	0	0	0	0	0	0	0	0	0	0	0	0	0	0	0					0	0	0	0	0	0	0	0	0	0	0	0	0	0	0	0	0	0	0	0
2h	0.3	0.6	0.8	0.9	0.5	0.5	0.6	0.2	0.2	0.7	0.1	0.4	0.3	0.4	0.7	0.7	0.6	0.4	0.7	0.5	0.7	0.5	0.6	0.4	0.3					0.06	0.06	0	0	0.1	0	0	0	0	0	0	0	0	0	0	0	0	0	0	0
4h	1.6	1.5	1.2	0.7	1.1	0.9	0.9	1.2	0.2	0.9	1.1	0.9	1.1	1.1	0.9	0.7	1.2	1.2			1.1	0.9	1.5	0.8	1					0.4	0.2	0.2	0	0.1	0.1	0	0	0	0	0	0.2	0.2	0.1	0.3	0.1	0.1	0.1
Figure 1C
	Veh																						Lepr																					Calcr
Time	0	0	0	0	0	0	0	0	0	0	0	0	0	0	0	0	0	0	0	0	0									0	0	0	0	0	0
0h	1.1	2.1	1.9	2.2	2.5	1.06	2.1	2	1.3	0.7	1.3	2.3	2.34	1.3	1.2	1.8	2.1	2.3	2.24	2.17	2.51									0.2	0.2	0.6	0.6	0.4	0.34
2h	1.9	3.2	2.6	3	2.5	1.06	3.3	3	2.4	1.5	2.1	2.8	2.75	1.82	1.49	2.1	2.53	2.86	2.59	2.82	3.1									0.8	1.1	1.1	1.7	1.3	0.5
4h
Figure 1D
Time	Veh																								Lepr																							Calcr
0	0	0	0	0	0	0	0	0	0	0	0	0	0	0	0	0	0	0	0	0	0	0	0									0	0	0	0	0	0	0	0
1	0.7	0.9	0.7	0.9	1	0.7	0.2	0.7	0.9	1.1	1	0.5	0.6	0.4	0.8	0.8	0.6	0.3	0.3	0.7	0.6	0.5	0.8									0.3	0.6	0.4	0.5	0.5	0.6	0.3	0.3
2	0.8	1.2	0.9	1.2	1	0.8	0.3	0.7	1	1.1	1.2	0.6	1	0.7	0.9	1.3	0.6	0.6	0.5	0.9	0.7	1	1.1									0.6	0.7	0.5	0.6	0.6	0.7	0.3	0.3
4	1	1.4	1.2	1.7	1.4	1.3	0.6	1.1	1.4	1.5	1.5	1.3	1.5	1.3	1.5	1.3	1	1	0.9	1.3	1.3	1.3	1.2									0.7	1.4	0.7	1.1	1	1.1	0.3	0.4
6	1.5	1.9	1.5	1.9	1.8	1.7	0.9	1.2	2	2.2	1.9	1.6	1.7	1.9	2.2	1.7	1.6	1.6	1.4	1.8	1.9	1.8	1.8									0.9	1.9	1	1.5	1.4	1.3	0.5	0.6
Figure 1E
	Ctrl										Lepr										Calcr										LC
			4.8	4.4	4.6	3.9	3.5						2.7	4.9	4.8	4.2	3.7						4.5	5.8	4.3	3.8	4.7				5.2	3.7	4.1	3.9	4.4	4.4	4.7	3.9
			4.8	3.7	3.7	4.1	3.4						2.9	3.2	3.6	3.7	3.4						4	4.5	4.7	3.5	2.6				4.1	3.4	3.8	3.6	4	3.6	3.6	2.8
			3.9	3.7	3.6	3.4	3.2						4.8	4.2	3.6	3.3	3						4	4.4	3.7	3.9	3.5				2.6	3.4	3.5	4.1	4	3.5	3.3	3.9
			4.9	3.4	3.3	3.7	3.4						2.4	2.7	1.4	2	1.7						1.2	0.4	2.3	0.9	1.1				0.3	0.2	0.5	0.5	0.3	0.1	0	0.1
			4	3.6	4.3	3.6	3.3						4.1	2.1	3.2	2.8	1.6						2.1	0.8	3.5	1	1.5				0.7	0.9	1.3	1.4	1.5	0.8	1	0.9
			4.5	3	3.5	3.3	3.1						2.2	1.4	3.3	2.9	2.7						2.9	2.2	4	2.8	3.6				3.6	2.9	3.3	3.8	3.5	3.2	2.7	3.7
Figure 1F
	Ctrl										Lepr										Calcr										LC
			0.996016	0.970711	1.00755	0.992593	0.987552						0.939799	0.981132	1	1.00465	1.01594						0.993377	0.985251	1.00735	0.996599	1.05517				1.03409	0.984456	1.00532	0.976959	0.977578	0.992727	1.02837	0.993884
			1.01594	0.987448	1	0.996296	0.975104						0.949833	0.974843	1	1.0093	1.01594						0.986755	0.9941	1.01838	0.989796	1.01035				1.03409	0.984456	0.989362	0.976959	0.991031	0.989091	1.02128	0.981651
			1	1	1	1	1						1	1	1	1	1						1	1	1	1	1				1	1	1	1	1	1	1	1
			1.02789	0.987448	1.00377	1.00741	0.983402						0.9699	0.959119	0.965217	0.948837	0.968127						0.937086	0.879056	0.992647	0.918367	0.965517				0.886364	0.917098	0.925532	0.917051	0.887892	0.894545	0.897163	0.911315
			1.00797	0.983264	1.00755	0.985185	0.983402						0.966555	0.943396	0.978261	0.972093	0.948207						0.913907	0.867257	0.959559	0.863946	0.937931				0.852273	0.875648	0.909574	0.870968	0.883408	0.865455	0.85461	0.877676
			1.03187	0.979079	1.00755	0.97037	0.987552						0.949833	0.90566	0.991304	1	1.01195						0.923841	0.873156	0.977941	0.928571	0.968966				0.94697	0.948187	1	0.963134	0.959641	0.923636	0.91844	0.957187
Figure 1G
	Ctrl													LiCl													CNO (LCDq)
Preference ratio	1	1	0.8125	1	0.85	0.75	1	0.888889	0.727273	0.75				0.153846	0.466667	0	0.695652	0.125	0.3	0.076923		0.333333	0.125								0.8125	0.809524	0.9375	0.954545	1
Figure 1H
	Ctrl																		LiCl																		CNO (LCDq)
Saccrin	0.857143	0.875	0.736842	0.782609	0.866667	0.733333	0.777778	1	0.95098	0.913043	0.809524	0.526316	0.863636						0	0.695652	0.125	0.3	0.076923		0.518519	0.2	0.2	0.2	0.681818	0.25	0.076923	0.190476	0.571429										0.857143	0.875	0.736842	0.782609	0.866667
