# Supplementary material for: Multiple NTS neuron populations cumulatively suppress food intake
Source: eLife. 2023 Dec 7;12:e85640. doi: 10.7554/eLife.85640 (PMC10781422; doi:10.7554/eLife.85640)
Supplement: Figure 2—figure supplement 1—source data 1. [file elife-85640-fig2-figsupp1-data1.xlsx]

## Sheet: Sheet1
Figure 2 Figure Supplement 1A
		time (hour)	Ctrl							LC-Tettox
		0:00:00	0	0	0	0	0	0	0	0	0	0	0	0	0	0
		0:15:00	0	0	0.04	0.0625	0	0.0275	0.1125	0.0025	0	0	0.0575	0	0.005	0
		0:30:00	0.112	0.032	0.06	0.0625	0	0.0475	0.1185	0.0365	0.042	0.034	0.1075	0	0.007	0
		0:45:00	0.3	0.08	0.136	0.1265	0	0.0855	0.1485	0.1925	0.178	0.034	0.1275	0	0.069	0.036
		1:00:00	0.37	0.186	0.256	0.2705	0.032	0.1215	0.1725	0.2505	0.396	0.148	0.2255	0.078	0.167	0.072
		1:15:00	0.438	0.228	0.354	0.2825	0.058	0.1855	0.1765	0.3585	0.4	0.158	0.3255	0.078	0.233	0.12
		1:30:00	0.554	0.438	0.366	0.3625	0.098	0.2115	0.1845	0.4685	0.456	0.158	0.4035	0.152	0.345	0.174
		1:45:00	0.664	0.548	0.47	0.3965	0.098	0.2475	0.2945	0.7065	0.464	0.222	0.4335	0.26	0.367	0.326
		2:00:00	0.664	0.582	0.51	0.4245	0.12	0.2735	0.2945	0.7985	0.512	0.388	0.5075	0.466	0.515	0.412
		2:15:00	0.718	0.616	0.638	0.4385	0.142	0.3155	0.2945	0.8745	0.668	0.396	0.5715	0.538	0.551	0.44
		2:30:00	0.796	0.648	0.672	0.4945	0.142	0.3555	0.2965	0.9545	0.772	0.446	0.6975	0.602	0.635	0.488
		2:45:00	0.886	0.816	0.764	0.6085	0.302	0.3835	0.3025	1.0325	0.774	0.532	0.7255	0.606	0.939	0.668
		3:00:00	1.044	0.924	0.828	0.6545	0.302	0.4275	0.3265	1.0525	0.83	0.582	0.9355	0.7	1.025	0.886
		3:15:00	1.082	0.938	0.93	0.6545	0.324	0.5055	0.3425	1.1305	0.926	0.638	0.9615	0.786	1.059	1.068
		3:30:00	1.086	1.046	1	0.6785	0.374	0.5695	0.3625	1.1845	1.04	0.83	1.0055	0.878	1.065	1.154
		3:45:00	1.224	1.102	1.106	0.7845	0.406	0.6215	0.3625	1.2765	1.244	0.87	1.0935	1.056	1.179	1.216
		4:00:00	1.358	1.204	1.236	0.9745	0.422	0.6975	0.3765	1.3565	1.422	0.984	1.1555	1.172	1.459	1.29
		4:15:00	1.366	1.344	1.372	1.1065	0.53	0.7655	0.4325	1.4405	1.492	1.066	1.2235	1.292	1.483	1.486
		4:30:00	1.42	1.39	1.466	1.1205	0.53	0.8735	0.5145	1.6105	1.608	1.192	1.3135	1.38	1.483	1.486
		4:45:00	1.54	1.458	1.526	1.2465	0.58	0.8775	0.5585	1.6885	1.646	1.378	1.3935	1.428	1.535	1.82
		5:00:00	1.566	1.556	1.638	1.3445	0.626	0.9075	0.6745	1.7725	1.686	1.458	1.5635	1.616	1.779	2.002
		5:15:00	1.818	1.648	1.692	1.3905	0.628	0.9335	0.7545	1.9845	1.918	1.666	1.6475	1.668	2.133	2.112
		5:30:00	2.084	1.832	1.746	1.5085	0.654	0.9715	0.9225	2.1325	2.03	1.826	1.7175	1.8	2.219	2.174
		5:45:00	2.088	1.914	1.948	1.5385	0.874	0.9915	0.9385	2.1985	2.078	1.93	1.8475	1.88	2.303	2.206
		6:00:00	2.1	2.004	2.018	1.5485	0.93	1.0635	0.9385	2.2325	2.124	1.996	1.9615	1.956	2.347	2.2585
		6:15:00	2.194	2.098	2.204	1.5685	0.974	1.1255	0.9645	2.4705	2.218	2.142	2.0175	2.114	2.379	2.5725
		6:30:00	2.396	2.25	2.222	1.6525	1.086	1.1935	1.0125	2.6665	2.314	2.302	2.0695	2.432	2.419	2.7205
		6:45:00	2.466	2.298	2.374	1.7745	1.171	1.2335	1.2545	2.7785	2.446	2.51	2.1155	2.496	2.473	2.8985
		7:00:00	2.592	2.384	2.432	1.9685	1.333	1.2575	1.2985	2.8665	2.55	2.554	2.2115	2.646	2.473	2.9525
		7:15:00	2.608	2.426	2.45	2.1565	1.423	1.2735	1.3925	2.8705	2.644	2.614	2.3875	2.788	2.557	2.9945
		7:30:00	2.622	2.574	2.506	2.3285	1.493	1.2955	1.5385	2.8945	2.738	2.626	2.4575	2.84	2.711	3.0565
		7:45:00	2.622	2.622	2.606	2.3665	1.549	1.2995	1.6485	2.9385	2.764	2.708	2.6275	2.842	2.727	3.1125
		8:00:00	2.638	2.696	2.652	2.4025	1.625	1.3275	1.6685	3.1165	2.874	2.768	2.6735	2.972	2.729	3.1705
		8:15:00	2.71	2.718	2.686	2.4585	1.717	1.3435	1.7305	3.1865	3.078	2.806	2.7815	3.052	2.967	3.2605
		8:30:00	2.904	2.77	2.788	2.4625	1.805	1.4295	1.7945	3.2965	3.168	2.828	2.8235	3.188	3.045	3.3565
		8:45:00	2.956	2.824	2.8	2.5005	1.821	1.4415	1.8045	3.4545	3.216	2.83	2.8395	3.21	3.045	3.4115
		9:00:00	2.98	2.966	2.85	2.5865	1.831	1.4735	1.8765	3.6065	3.224	2.942	2.8655	3.26	3.191	3.53817
		9:15:00	3.094	3.198	2.97	2.5905	1.983	1.4975	1.9245	3.6525	3.278	2.994	2.9015	3.338	3.321	3.88417
		9:30:00	3.202	3.204	3.086	2.6525	2.003	1.4975	1.9685	3.6525	3.324	3.1	2.9455	3.364	3.541	4.01417
		9:45:00	3.202	3.21	3.182	2.6685	2.009	1.4975	2.0825	3.6945	3.34	3.232	2.9795	3.406	3.587	4.10917
		10:00:00	3.302	3.24	3.264	2.8045	2.071	1.5135	2.1725	3.7665	3.354	3.244	3.0975	3.418	3.629	4.20117
		10:15:00	3.32	3.24	3.366	2.8225	2.071	1.5235	2.1845	3.8585	3.388	3.244	3.0995	3.466	3.695	4.20367
		10:30:00	3.348	3.24	3.392	2.8645	2.087	1.5475	2.2265	3.8605	3.428	3.328	3.1455	3.492	3.719	4.25867
		10:45:00	3.376	3.242	3.41	2.9265	2.151	1.6335	2.2565	3.9265	3.666	3.328	3.2055	3.526	3.745	4.42467
		11:00:00	3.528	3.266	3.412	2.9925	2.235	1.6675	2.2765	4.0425	3.706	3.39	3.2775	3.672	3.849	4.42467
		11:15:00	3.612	3.34	3.506	2.9945	2.355	1.6675	2.3045	4.1785	3.744	3.462	3.3495	3.774	3.933	4.47267
		11:30:00	3.7	3.388	3.524	3.0245	2.539	1.6675	2.4405	4.3105	3.86	3.552	3.4515	3.782	3.973	4.50467
		11:45:00	3.718	3.432	3.56	3.0805	2.587	1.6675	2.4685	4.3685	3.898	3.638	3.4755	3.866	4.151	4.58867
		12:00:00	3.798	3.454	3.67	3.1945	2.619	1.7275	2.4985	4.4505	3.962	3.648	3.5155	3.89	4.155	4.75867
		12:15:00	3.804	3.474	3.704	3.3025	2.619	1.7715	2.6225	4.4865	4.28	3.648	3.5695	4.004	4.169	4.84867
		12:30:00	3.804	3.478	3.704	3.3045	2.619	1.7715	2.6485	4.4865	4.364	3.656	3.5715	4.086	4.171	4.85067
		12:45:00	3.804	3.478	3.704	3.372	2.714	1.7715	2.7385	4.4865	4.364	3.656	3.5715	4.1635	4.171	4.89317
		13:00:00	3.804	3.478	3.704	3.392	2.8465	1.7715	2.786	4.4865	4.364	3.656	3.5715	4.1635	4.171	4.89567
		13:15:00	3.804	3.478	3.704	3.397	2.8465	1.7715	2.786	4.5265	4.364	3.7135	3.5715	4.1635	4.171	4.89567
		13:30:00	3.804	3.478	3.704	3.3995	2.8465	1.7715	2.8035	4.6165	4.364	3.7535	3.5715	4.1785	4.171	4.91567
		13:45:00	3.804	3.478	3.709	3.487	2.8465	1.8115	2.8035	4.6165	4.3715	3.7535	3.614	4.1785	4.171	4.92817
		14:00:00	3.824	3.478	3.749	3.6045	2.969	1.819	2.8035	4.6165	4.414	3.7535	3.614	4.1785	4.171	4.92817
		14:15:00	3.8815	3.478	3.7615	3.7095	2.969	1.819	2.821	4.6715	4.424	3.806	3.614	4.1785	4.171	4.92817
		14:30:00	3.899	3.4905	3.7615	3.747	3.009	1.819	2.9685	4.684	4.424	3.8535	3.614	4.181	4.171	4.92817
		14:45:00	3.899	3.5355	3.7715	3.747	3.0265	1.819	3.0185	4.684	4.424	3.8835	3.614	4.2035	4.171	4.92817
		15:00:00	3.899	3.538	3.7715	3.747	3.1465	1.819	3.0185	4.684	4.424	3.911	3.614	4.2035	4.171	4.92817
		15:15:00	3.899	3.538	3.7715	3.7945	3.1615	1.819	3.0185	4.684	4.424	3.911	3.614	4.206	4.196	4.92817
		15:30:00	3.949	3.543	3.774	3.8845	3.1765	1.8215	3.026	4.684	4.4415	3.911	3.614	4.206	4.2135	4.92817
		15:45:00	3.9915	3.583	3.7765	3.8845	3.2115	1.824	3.0635	4.684	4.4515	3.911	3.614	4.206	4.2185	4.92817
		16:00:00	3.9915	3.583	3.7765	3.8845	3.2115	1.824	3.0885	4.684	4.4565	3.911	3.614	4.206	4.2185	4.92817
		16:15:00	3.994	3.693	3.829	3.8845	3.2115	1.824	3.0885	4.684	4.584	3.911	3.614	4.2435	4.2185	4.95067
		16:30:00	3.994	3.6955	3.864	3.8845	3.2115	1.8315	3.1185	4.684	4.584	3.911	3.614	4.271	4.2185	4.95067
		16:45:00	4.0265	3.6955	3.8665	3.9495	3.2115	1.834	3.1185	4.684	4.624	3.911	3.614	4.321	4.2185	5.08317
		17:00:00	4.0265	3.6955	3.8665	3.9845	3.2115	1.834	3.1185	4.7165	4.624	3.941	3.614	4.321	4.2185	5.08317
		17:15:00	4.0665	3.8105	3.8665	3.9895	3.2115	1.834	3.1185	4.789	4.624	4.046	3.614	4.321	4.2185	5.08317
		17:30:00	4.0715	3.8255	3.8665	3.9895	3.2115	1.834	3.1185	4.789	4.624	4.0685	3.679	4.321	4.2185	5.08317
		17:45:00	4.0715	3.828	3.8665	3.9895	3.2115	1.834	3.1185	4.8065	4.624	4.0735	3.7065	4.321	4.2185	5.08317
		18:00:00	4.0715	3.828	3.869	4.0045	3.2115	1.834	3.1185	4.9915	4.624	4.0735	3.7065	4.321	4.2185	5.08317
		18:15:00	4.1065	3.833	3.949	4.0345	3.2115	1.8565	3.1285	5.014	4.624	4.0735	3.7065	4.321	4.2185	5.08317
		18:30:00	4.1065	3.833	3.954	4.0745	3.2115	1.8565	3.1285	5.019	4.624	4.096	3.7065	4.321	4.2185	5.08317
		18:45:00	4.159	3.833	3.954	4.0745	3.2115	1.8565	3.1285	5.0215	4.624	4.096	3.7065	4.321	4.2185	5.08317
		19:00:00	4.164	3.833	3.954	4.0745	3.2115	1.8565	3.1285	5.024	4.624	4.096	3.7065	4.321	4.2235	5.08317
		19:15:00	4.164	3.873	3.954	4.0745	3.2115	1.8565	3.1285	5.0615	4.624	4.096	3.7065	4.321	4.2235	5.08317
		19:30:00	4.364	3.8755	3.954	4.1995	3.2115	1.8565	3.1585	5.064	4.624	4.096	3.7065	4.321	4.2235	5.08317
		19:45:00	4.459	3.9105	3.954	4.1995	3.2115	1.9615	3.1585	5.064	4.624	4.096	3.7065	4.321	4.2235	5.14567
		20:00:00	4.5115	3.9205	4.129	4.1995	3.2115	1.964	3.1585	5.119	4.634	4.096	3.8865	4.321	4.2235	5.14567
		20:15:00	4.514	3.9205	4.164	4.237	3.2115	1.9665	3.1635	5.119	4.634	4.096	3.9065	4.321	4.2235	5.14567
		20:30:00	4.514	3.9205	4.2065	4.2845	3.2115	1.9665	3.1635	5.119	4.634	4.1185	3.909	4.321	4.2235	5.14567
		20:45:00	4.514	3.9205	4.2065	4.2895	3.2115	1.9665	3.1635	5.119	4.634	4.121	3.909	4.356	4.2235	5.14567
		21:00:00	4.6765	3.9205	4.2065	4.2895	3.2115	1.9815	3.1635	5.2015	4.6515	4.121	3.909	4.356	4.2235	5.14567
		21:15:00	4.6815	3.9755	4.2065	4.3295	3.334	1.9815	3.1635	5.354	4.6515	4.121	3.909	4.356	4.2235	5.14567
		21:30:00	4.6815	4.0855	4.244	4.3295	3.334	1.9815	3.1635	5.354	4.699	4.1435	3.909	4.376	4.2235	5.14567
		21:45:00	4.6815	4.1305	4.244	4.3845	3.334	1.9815	3.1635	5.354	4.7165	4.176	3.909	4.376	4.2235	5.14567
		22:00:00	4.7765	4.1305	4.244	4.3895	3.334	1.9815	3.1635	5.354	4.7215	4.1835	3.9165	4.376	4.2235	5.14567
		22:15:00	4.7765	4.1305	4.244	4.422	3.334	2.0315	3.2785	5.354	4.724	4.2185	3.9415	4.376	4.2235	5.14567
		22:30:00	4.7765	4.133	4.299	4.422	3.334	2.0315	3.2985	5.3565	4.7615	4.2435	3.9515	4.376	4.2235	5.14567
		22:45:00	4.7765	4.1505	4.299	4.577	3.334	2.0965	3.2985	5.3565	4.764	4.2435	3.969	4.376	4.2235	5.14567
		23:00:00	4.7765	4.1955	4.299	4.637	3.334	2.0965	3.2985	5.4015	4.774	4.2435	3.9715	4.376	4.2235	5.14567
		23:15:00	4.7765	4.268	4.3265	4.637	3.334	2.1165	3.2985	5.4015	4.799	4.2435	3.9715	4.376	4.2235	5.14567
		23:30:00	4.7765	4.2705	4.3465	4.637	3.334	2.144	3.306	5.4015	4.839	4.2435	4.024	4.376	4.2235	5.15317
		23:45:00	4.789	4.273	4.359	4.637	3.334	2.144	3.321	5.4565	4.8865	4.2435	4.0265	4.406	4.2335	5.15317
		24:00:00	4.789	4.273	4.534	4.637	3.334	2.144	3.346	5.539	4.9765	4.2435	4.029	4.406	4.2335	5.15317
Figure 2 Figure Supplement 1B
		Ctrl	LC-Tettox
		4.789	5.539
		4.273	4.9765
		4.534	4.2435
		4.637	4.029
		3.334	4.406
		2.144	4.2335
		3.346	5.15317
Figure 2 Figure Supplement 1C
		Ctrl	LC-Tettox
		3.798	4.4505
		3.454	3.962
		3.67	3.648
		3.1945	3.5155
		2.619	3.89
		1.7275	4.155
		2.4985	4.75867
Figure 2 Figure Supplement 1D
	Ctrl													LCTettox
0	41.7	25.37		41.16	33.82			33.48	38.16		29.25			51.06	43.01			44.27			55.26	48.28	52.33
1	39.66	23.58		39.78	32.54			32.7	36.9		28			50.14	41.6			42.7			53.62	48.28	51.14
2	38.28	22.1		38.36	30.98			30.84	35.24		25.52			48.66	39.56			40.5			50.18	45.24	48.94
3	36.36	20.98		36.58	28.82			29.7	33.72		25.16			45.18	37.08			38.74			49.12	43.82	45.42
4	35.8	21.06		34.64	29.3			29.42	32.6		23.72			43.82	36.48			38.16			47.8	42.3	44.08
5	33.7	21.54		33.2	28.82			30	31.7		23.82			41.99	36.14			37.7			48.18	43.16	43.8
6	33.06	22.3		32.22	29.42			29.94	31.62		23.86			40.3	36.2			37.96			48.26	43.02	43.08
7	32.04	22.62		31.8	29.84			29.88	33.3		24.76			39.28	35.7			36.08			47.36	43.74	43.12
8
9
10
11
12
13
14	31.22	23.77		34.69	31.59			29.44	33.16		25.88			41.3	35.3			35.44			47.4	43.42	36.56
15
16
17
18
19
20
21	31.9	26.48		35.78	33.6			29.46	34.38		27.74			46.08	33.8			30.02			48.56	44.62	38.92
22
23
24
25
26
27
28	33.07	27.45		34.98	32.24			31.44	36.04		28.54			47.69	34.81			30.69			52.64	46.74	39.54
29
30
31
32
33
34
35	33.21	29.13		33.54	32.3			31.58	35.64		29.02			50.14	35.04			34.03			53.16	48.68	40.8
Figure 2 Figure Supplement 1E
	LC ctrl														LC tettox
0			100		100				100		100	100	100		100		100		100					100	100		100	100
1			96.7		95.73				92.94		96.65	96.22	100		100		100		100					96.72	97.81		96.45	98.98
2			92.35		87.25				87.11		93.2	91.6	84.68		96.44		93.7		95.01					91.98	88.4		91.48	89.89
3			88.36		86.02				82.7		88.87	85.22	80.36		89.11		90.76		89.72					86.21	88.52		87.51	84.04
4			85.43		81.09				83.01		84.16	86.64	84.68		86.27		87.61		89.57					84.82	84.66		86.2	85.24
5			83.07		81.44				84.9		80.66	85.22	87.48		84.83		89.4		90.48					84.03	82.69		85.16	88.06
6			82.86		81.57				87.9		78.28	86.99	89.01		84.47		89.11		89.37					84.17	82.49		85.75	89.05
7			87.26		84.65				89.16		77.26	88.23	91.89		84.52		90.6		89.22					83	83.89		81.5	89.96
8
9
10
11
12
13
14			86.9		88.48				93.69		84.28	93.41	94.5		80.92		89.93		86.2					82.07	92.82		80.05	89.4
15
16
17
18
19
20
21			90.09		94.84				104.38		86.93	99.35	98.74		78.89		92.42		90.23					78.59	92.18		67.81	91.65
22
23
24
25
26
27
28			94.44		97.57				108.2		84.99	95.33	99.19		81.1		96.81		96.17					80.93	91.92		69.32	98.13
29
30
31
32
33
34
35			93.4		99.21				114.82		81.49	95.51	103.87		80.29		100.83		101.61					81.47	92.54		76.87	99.19
Figure 2 Figure Supplement 1F
	Ctrl													LCTettox
7	6.42	8.52		6.96667	8.30667			8.46	5.84	0	5.36			8.38	7.19			6.37		6.08	6.5	8.62	7.28
14	19.26	25.56		20.9	24.92			20.78	21.44	0	20.26			25.14	21.57			19.11		20.98	25.54	27.24	25.3
21	38.24	46.46		40.48	48.72			35.96	38.12	0	33.94			56.94	37.56			35.94		37.68	47.84	47.72	45.46
28	56.51	62.95		53.63	63.4			49.88	53.18	0	47.56			79.97	54.82			56.13		55.54	68.98	69.7	68.76
35	74.93	83.59		68.61	108.02			66.76	69.78	0	65.54			107.92	73.89			85.66		74.24	92.86	92.76	99.6
42	107.42	119.33		94.92	142.84			81.42	83.5	0	77.68			156.49	105.65			127.38		93.04	111.96	110.72	123.48
Figure 2 Figure Supplement 1G
Ctrl															LCTetTox															Ctrl															LCTetTox
	10.23	12.07		6.54			14.63	4.57		19.95	11.74					22.82	19.22	21.28					20.38	20.23			16.28				20.4	22.6		20.79			24.21	17.86		18.99	20.16					27.64	24.86	26.91
Figure 2 Figure Supplement 1H
Ctrl	LCTetTox	Ctrl	LCTetTox
7.56		20.44	19.28
9.93	21.94	21.81	26.01
4.81	20.39	20.62	24.74
7.39	10.59	24.31	25.49
10.94	25.81	19.01	27.08
9.38	14.41	19.8	18.82
3.03	6.22	16.97
Figure 2 Figure Supplement 1I
Ctrl	LCTetTox	Ctrl	LCTetTox
-2.67	-0.88	0.04	0.5
-2.14	1.17	-0.79	-1.63
-1.73	-10.69	-0.17	-0.12
-7.24	5.43	0.1	-1.42
6.37	-5.82	1.15	-1.34
-11.32	-4.45	-0.36	-0.7
-2.36		2.61
Figure 2 Figure Supplement 1J
	Ctrl												LCTetTox
0 min	179	173		187			133.5	148		159.5	153.5			225	187.5	159					184	188		175.5
10 min	359.5	301		196			224.5	372		348.5	293			412.5	269.5	352					264.5	348.5		393.5
Figure 2 Figure Supplement 1K
	Ctrl													LCTettox
0	140.5	170.5	183			146	161		142	177					225	178.5	131					173.5	185		109
15	351.333	354	317.5			295	413		335	413.5					459	346.5	351.5					310	383.5		199.5
30	334.5	274	244			177.5	225.5		133	128.5					335.5	327.5	271					224	202		147.5
45	204.5	164.5	176			152.5	180.5		166.5	183.5					159.5	194.5	105					186	186.5		156
60	189	185	237.5												246.5	233.5	135.5
75
90
105
120	158	126.5	167.5			132	145.5		130.5	154.5					191	191.5	136					155.5	184.5		134.5
Figure 2 Figure Supplement 1L
	Ctrl													LCTetTox
Fasted		0.846	1.224		1.107			1.223	0.8775		0.852	0.939			4.01	2.2635	2.303					2.708	1.0015		1.1985
10 min		3.217	1.6585		1.871			6.6605	4.199		1.9465	5.502			11.7965		17.1305					8.2525	3.281		6.2745
