# Supplementary material for: Multiple NTS neuron populations cumulatively suppress food intake
Source: eLife. 2023 Dec 7;12:e85640. doi: 10.7554/eLife.85640 (PMC10781422; doi:10.7554/eLife.85640)
Supplement: Figure 2—source data 1. [file elife-85640-fig2-data1.xlsx]

## Sheet: Sheet1
Figure 2B
	Ctrl										Lepr-Tettox
0	0	0	0	0	0	0	0				0	0	0	0	0	0	0		0	0
1	38.57	35.4	34	36.8	38.7	31	33.9				43.4	34.8	33.4	32.7	27.3	38.2	30.5
2	71.3	61.2	61.6	63.9	70.6	61.1	68.4				79.6	61.1	61	58.5	55.5	67.5	58
3	99	85.8	88.2	91	99.7	95.3	96.4				114.9	87	91.2	83.4	81.1	93.3	81.9
4	131.2	116.1	114.8	120.5	130.1	117.5	127				154	114.8	136.5	108.2	110.1	121.1	108.9
5	158.9	140.1	140.6	147.9	155.1	141.6	149.9				190.1	141.6	175.1	132.9	134.1	143.6	130.5
6	186.8	164.9	165.9	176.3	183.2	171.1	178.7				226.7	168.1	195.2	158.3	166.6	169.7	157.6
Figure 2C
	Ctrl										Lepr-Tettox
	0	0	0	0	0	0	0				0	0	0	0	0	0	0
	24.8	26.5	26.7	21.4	25.1	21.1	23.9				25.9	28.9	29.6	28.1	18.4	23.3	31
	43.1	46.4	45.2	40.2	43.1	38.9	40.2				44.9	48.6	51.9	56.1	34.6	41.4	56.6
	58.2	64.3	62.7	55.8	60.6	57.4	57.1				63.5	65.6	71.7	75.7	49.6	59.4	79.2
	75.2	82.2	76.6	73.7	77.8	76.3	73.5				82.8	83.3	90.5	89.4	66	76.9	98.2
	93.9	97.3	90.9	89.9	94.9	96	90.5				102.8	103.5	109.8	110	83.2	91.7	116.2
	110.7	111.5	107.2	104.4	108.9	111.2	106.8				123.2	122	132.1	129.7	98	105.2	134.9
Figure 2D
	Ctrl										Lepr-Tettox
0		0	0	0	0	0	0	0	0			0	0	0	0	0	0	0	0
1		-0.3	0.1	0	1.9	2	-0.1	0.2	-1.6			-0.3	0.8	1	2.2	1.1	1.1	3.7	-0.1
2		0.2	0.4	-0.3	2.8	3.5	-0.1	0.4	-0.7			0.3	2	1.8	4.6	2.1	0	6.2	0.5
3		-0.7	1.3	0.6	3.9	4	-0.2	1.4	-0.1			0.4	1.7	2.3	5.4	3.7	0.3	6.3	1.8
4		0.1	1.3	1.5	3.5	4.5	0.7	1.9	0.23			0.6	3.1	2.9	6.7	3.2	-0.5	5.5	1.3
5		-0.2	1.7	1.9	4.7	4.6	0.7	1.8	0.6			0.9	6.4	3.1	6.6	4.5	-0.6	5.8	2.7
6		0.8	1.9	1.9	4.5	5.1	1	1.2	0.9			0.9	5.7	3.9	6.5	4.4	0.9	5.3	2.7
1		6.5	7.6	5.3	6.7	6.9	2	0.7	0.7			7.9	13	9.9	9	7	3.4	9.4	2.4
2		8.5	9.4	7.2	10	8.1	3.9	2.2	0.3			9.6	15.4	16.1	8.1	9.3	9.5	13.7	3.8
3		10.3	10.1	8.8	11.6	9.6	4.1	2.1	-0.2			9.7	16.8	12.6	8.8	11.1	14.7	17.6	3.6
4		12.9	9.1	10.7	13.2	12	5.6	2.1	-0.3			11.4	18.1	13.7	9.2	13	17.9	18.4	4.9
5		12.5	8.2	12.1	14.6	14.2	6.2	1.5	-0.2			14.3	20	16.6	10	14.3	17.7	18.4	5.6
6		11.6	8.4	12.1	16.2	16	6.4	2.3	0.4			15.2	23.7	17.4	10.7	13.2	18.4	18.5	4.1
Figure 2F
	Ctrl												LC-Tettox
0				0	0	0	0	0	0	0			0	0	0	0	0	0	0	0
1				36.14	34.6	37.8	32.4	29.5	31.2	32.5			32.7	35.9	35.6	36.8	31.7	35.2	35.7	40.3
2				70.19	62.3	60.6	58.8	54.4	56	62.3			59.86	63	63.1	69.4	57	62.6	64.8	70
3				99.44	93.8	93.6	89.1	81.4	83.2	96.6			89.1	94.3	93.7	103.3	86.3	93.8	95	103.3
4				136.94	116.5	115.7	112	101.6	103.9	123.4			127.3	116.3	116.1	126.7	107.2	117.2	119.7	126.3
5				160.84	153.1	177.8	173.6	161.5	160	170.2			151.71	180.7	175.6	212.5	166.7	171.8	185.1	200.7
6				192.84	200.8	202.8	201.4	188.6	160	145.6			193.3	208.9	200.4	243.7	193.1	204.6	212.9	228.7
Figure 2G
	Ctrl												LC-Tettox
0				0	0	0	0	0								0	0	0	0	0
1				24.1	24.1	24.1	24.1	24.1								24.1	24.1	24.1	24.1	24.1
2				43.1	42.5	43.2	49.8	32.8								71.4	54.2	42	61.2	56.3
3				61.4	61.6	58.5	64.4	44.3								92.4	74.5	59.6	85.1	73.5
4				80.6	77.6	72.3	78.7	61.2								113.6	91.3	74.3	105.2	90.9
5				114	94.9	88.7	94.7	81.2								153	104	91.6	128	115.9
6				132.6	114.2	107.7	115.5	98.7								176.3	128.4	111.8	151.7	138.3
Figure 2H
	Ctrl																								LC-Tettox
0						0		0	0	0	0	0	0	0	0	0	0														0	0	0	0	0	0	0	0	0	0	0	0
1									-0.4	-0.2	1	3.8	-0.9	-1.3	0.4	0.4	0.5																0.7	0.7	0.7	0.5	4.2	-0.4	0.5	1.9	1.7	3.1
2						2.7			0.6	2	3.5	3.2	-2.1	-1	1.6	1.5	1.2														3.7		1.1	1.9	2.6	2.2	4.9	-1.7	0	3.1	3.6	4.6
3						2.8		2	1.7	2.8	5.9	3.8	-2.1	-1.4	1.4	2.6	1.6														3.1	4	2.4	2.9	4	2.3	7.2	-1.5	0.4	4.1	4.3	5.5
4						2.9		2.9	2	3.7	6.4	4.27	-1.8	-0.7	2.5	2.9	2.7														3.6	4	2.2	4.2	3.8	2.6	7.54	-1.6	0.7	4.7	5.3	5.9
5						3		2.9	2.2	4.1	6.4	5	-1.4	-0.4	3.1	3.5	2.9														2.8	5.2	4	4.6	5.1	3.6	8.7	-1.7	2	5.06	6.3	6.7
6						3.4		3.6	3.1	4.84	7.4	5	-0.7	-0.5	3.2	4	3.9														4	5.2	4.3	5.4	6.1	6	8.8	-0.8	1.8	5.7	5.6	7.2
1						3.7		2	3.8	7.1	5.4	2.8	1.1	-1.6	0.7	0	0.1														9.4	8.6	2.7	8.4	3.4	5.8	-0.5	7.5	2.1	0.4	1.1	0.9
2						5.3		3.7	5	8.6	10.6	4	3.3	0.1	-0.1	1.8	1.5														11.5	11.2	3.5	12.2	4.8	9.7	2	8.1	8.5	2.9	3.7	8.8
3						5.2		6.7	5.9	8.9	13.9	4.5	1.4	1.4	0.6	0.5	4.6														10.8	14.9	5.3	15.8	5.4	10.7	6.5	10.3	12.1	5	8.2	15.6
4						10.1		7.4	5.4	9.2	16.5	6.2	3.4	3.9	1.5	1.4	6.8														10.9	15.4	6	17.4	7.7	10.4	7.6	13.4	15	6.9	12.9	21.6
5						12.6		7.9	6.3	9.9	15.6	7.5	6.5	4.3	1.5	2.3	8.3														13.8	12.7	7.1	20.3	11.3	16	14.1	19	15.7	8.9	16.6	26.4
6						12.8		8.9	7.5	12.9	16.7	9.6	8.5	5.9	2.1	4.4	10.9														14.9	18.4	8.4	21.6	14.1	19.6	19.9	24.5	18	12.7	15.5	30
Figure 2I
	Lepr-Tettox													Calcr-Tettox													LC-Tettox
			1	1	1	1	1	1	1	1	1						1	1	1	1	1						1		1	1	1	1	1	1
			0.967742	1.07797	1.18769	1.13281	1	1.04498	1.25735	1.24579	1.23904						1.23649	1.04262	1.24746	1.06081	1.14815						1.36596		1.12054	1.26582	1.15668	1.21642	0.980469	1.28626
			0.992832	1.13898	1.34769	1.30078	1.05932	1.08651	1.31985	1.3266	1.48606						1.35811	1.10164	1.43051	1.08446	1.24501						1.4766		1.15625	1.38608	1.2212	1.36194	1.07812	1.30916
			1.00717	1.20339	1.44615	1.45312	1.05085	1.07612	1.32353	1.37374	1.34661						1.46959	1.18361	1.52881	1.16554	1.31054						1.63404		1.23661	1.5	1.24885	1.39925	1.25391	1.39313
			1.03584	1.24746	1.44	1.48438	1.10593	1.09343	1.38603	1.41751	1.39044						1.47973	1.18361	1.5322	1.14865	1.37322						1.65532		1.26786	1.55063	1.35484	1.38806	1.29688	1.51145
			1.06093	1.21017	1.46154	1.48438	1.13559	1.13149	1.49265	1.48148	1.50598						1.51351	1.14754	1.62373	1.17568	1.52422						1.54043		1.31696	1.6424	1.52074	1.59702	1.55078	1.72519
			1.10394	1.15932	1.48	1.48828	1.07203	1.15571	1.52574	1.60606	1.53785						1.52027	1.13443	1.71186	1.19595	1.57835						1.78298		1.375	1.68354	1.64977	1.73134	1.77734	1.93511
