# Supplementary material for: Multiple NTS neuron populations cumulatively suppress food intake
Source: eLife. 2023 Dec 7;12:e85640. doi: 10.7554/eLife.85640 (PMC10781422; doi:10.7554/eLife.85640)
Supplement: Figure 3—figure supplement 1—source data 1. [file elife-85640-fig3-figsupp1-data1.xlsx]

## Sheet: Sheet1
Figure 3- figure supplement 1A
		Control									Tettox
0		28.75	30.5	26.84	21.82	39.52	43.57	39.03	34.3	32.81			29.93	45.62	44.18	36.23	33.74
1		27.92	29.01	27.1	21.7	39.7	43.42	38.34	34.22	32.2			28.16	46.34	44.46	35.9	33.4
2		25.98	29.02	23.88	21.08	38.02	42.14	36.66	32.68	31.06			27.28	43.48	42.66	34.56	32.28
3		23.74	27.26	22.76	20.14	35.24	40	35.52	30.78	29.14			26.14	42.68	39.94	32.56	30.62
4		23.56	25.9	22.44	19.7	33.46	38.22	34.04	28.74	27.5			25	41.52	37.88	32.12	29.88
5		23.94	26.66	22.96	20.5	34.6	37.58	35.3	29.16	26.28			25.54	41.88	36.34	33.1	30.18
6		24.32	26.29	23.15	20.65	34.72	38.52	36.37	28.61	24.55			24.96	41.67	35.21	32.91	29.43
7		24.02	25.86	23.35	21.17	34.35	38.27	35.64	29.21	22.94			25.06	41.96	33.19	32.81	30.27
8
9
10
11
12
13
14		24.48	25.32	23.61	22.25	35.77	40.69	37.7	29.83	23.66			21.55	45.02	36.1	33.5	31.06
15
16
17
18
19
20
21		24.9	25.46	24.2	24.32	38.94	41.52	39.8	30.98	26.24			25.08	49.1	38.16	34.92	31.94
22
23
24
25
26
27
28		25.48	25.24	24	24.82	41.6	41.74	39.9	32.04	29.08			23.94	48.62	37.44	36	33.14
29
30
31
32
33
34
35		25.84	25.16	24.62	23.52	42.28	42.26	40.94	31.02	30.96			24.32	48.72	36.8	34.72	33.74
Figure 3- figure supplement 1B
		Control									Tettox
0	0	100	100	100	100	100	100	100	100	100			100	100	100	100	100
1	1	97.11	95.11	100.97	99.45	100.46	99.66	98.23	99.77	98.14			94.09	101.58	100.63	99.09	98.99
2	2	90.37	95.15	88.97	96.61	96.2	96.72	93.93	95.28	94.67			91.15	95.31	96.56	95.39	95.67
3	3	82.57	89.38	84.8	92.3	89.17	91.81	91.01	89.74	88.81			87.34	93.56	90.4	89.87	90.75
4	4	81.95	84.92	83.61	90.28	84.67	87.72	87.21	83.79	83.82			83.53	91.01	85.74	88.66	88.56
5	5	83.27	87.41	85.54	93.95	87.55	86.25	90.44	85.01	80.1			85.33	91.8	82.25	91.36	89.45
6	6	84.59	86.2	86.25	94.64	87.85	88.41	93.18	83.41	74.82			83.39	91.34	79.7	90.84	87.23
7	7	83.55	84.79	87	97.02	86.92	87.84	91.31	85.16	69.92			83.73	91.98	75.12	90.56	89.72
8	8
9	9
10	10
11	11
12	12
13	13
14	14	85.15	83.02	87.97	101.97	90.51	93.39	96.59	86.97	72.11			72	98.68	81.71	92.46	92.06
15	15
16	16
17	17
18	18
19	19
20	20
21	21	86.61	83.48	90.16	111.46	98.53	95.29	101.97	90.32	79.98			83.8	107.63	86.37	96.38	94.67
22	22
23	23
24	24
25	25
26	26
27	27
28	28	88.63	82.75	89.42	113.75	105.26	95.8	102.23	93.41	88.63			79.99	106.58	84.74	99.37	98.22
29	29
30	30
31	31
32	32
33	33
34	34
35	35	89.88	82.49	91.73	107.79	106.98	96.99	104.89	90.44	94.36			81.26	106.8	83.3	95.83	100
Figure 3- figure supplement 1C
	CCK_ctrl									CCK_tettox
7	6.05667	5.08333	5.7	6.77	6.77333	8.37	8.23333	6.04	5.12333			5.74333	9.71667	5.75	6.87	6.35667
14	18.17	15.25	17.1	20.31	20.32	25.11	24.7	18.12	15.37			17.23	29.15	17.25	20.61	19.07
21	34.45	28.79	31.36	37.73	40.95	43.46	43.5	33.89	33.58			37.26	54.28	36.31	39.67	35.65
28	56.33	45.07	47.4	56.79	64.39	63.16	61.38	51.47	55.44			55.96	78.3	54.87	59.47	53.25
35	83.57	64.05	63.34	74.89	82.71	82.64	79.48	66.81	75.6			76.42	101.42	68.23	74.63	71.29
42	100.87	79.49	78.22	91.15	99.73	96.4	95.62	80.05	95.52			94.8	122.26	83.05	89.43	83.49
Figure 3- figure supplement 1D
Ctrl	CckTetTox	Ctrl	CckTetTox
9.59		18.37
12.44		17.59
8.59	15.57	16.92	20
4.09	10.63	16.54	17.58
17.11	21.1	21.23	23.43
18.31	19.2	22.73	21.63
15.8	13.83	21.45	19.99
10.86		21.23
11.06		20.89
Figure 3- figure supplement 1E
Ctrl	CckTetTox	Ctrl	CckTetTox
3.26		17.51
5.99		16.29
3.28	2.98	16.6	15.64
2.81	18.05	16.19	22.35
11.65	11.59	20.28	20.91
14.29	10.39	21.61	19.44
13.05	7.24	20.91	20.39
6.79		19.46
2.23		18.18
Figure 3- figure supplement 1F
Ctrl	CckTetTox	Ctrl	CckTetTox
-7.78		-1.28
-5.91		0.14
-3.95	-4.34	1.11	0.69
0.46	1.37	1.14	0.96
0.89	-8.53	0.36	-1.07
-0.9	-3.26	-0.14	0.34
0.88	-0.57	0.13	0.07
-2.91		0.06
-2.37		0.96
Figure 3- figure supplement 1G
	Ctrl									CckTetTox
Fast	154.5	157.5	136	172.5	208.5	167.5	213	163.5	141.5					193	219	192.5	193.5	184
Fed	313	197.5	260.5	364.5	352	443	350	260	209					447.5	410.5	216	268.5	402.5
Figure 3- figure supplement 1H
		Ctrl									CCKTettox
0		146.5	169	148	149.5	189	213	190.5	178	168				185	202.5	152	132	198.5
15		328	385.5	408.5	300	359	312.5	359.5	331.5	316.5				444	444.5	377.5	215	402.5
30		145.5	185	381.5	201	385	237.5	243.5	219	212				245	566.5	180.5	184.5	285
45		160	217	267.5	162	242	225	188	169.5	220.5				218.5	358.5	179.5	123.5	190
60		159.5	174.5	186.5	172	262	247.5	207.5	186	196.5				214.5	354	165	131.5	226
120		122.5	128.5	139	138	211.5	210	195.5	139.5	178.5				175	162.5	152.5	98.5	180
Figure 3- figure supplement 1I
	Ctrl									CckTetTox
Fast	0.4035	1.348	0.6825	0.449	1.7485	2.1515	2.3075	1.1325	1.033					0.9525		2.5785	2.002	1.0335
Fed	1.237	3.8025	1.6205	0.813	2.5005	5.9605	6.806	2.9765	1.3525					1.1285		2.62	1.888	1.0345
