# Supplementary material for: Multiple NTS neuron populations cumulatively suppress food intake
Source: eLife. 2023 Dec 7;12:e85640. doi: 10.7554/eLife.85640 (PMC10781422; doi:10.7554/eLife.85640)
Supplement: Figure 3—source data 1. [file elife-85640-fig3-data1.xlsx]

## Sheet: Sheet1
Figure 3B
	Ctrl																Cck-Tettox
0						0	0	0	0	0												0	0	0	0	0
1						29.4	24.5	31.7	28.8	29.5												32.7	29.8	32.3	30.8	28.1
2						55.4	50.8	61	52.7	57												59.7	54.2	59.2	57.7	50.7
3						79.8	78.1	89	76.1	84.4												86.4	79.2	84.4	84.5	72.2
4						106.6	103	118.1	99.3	112												112	103	113.3	112.3	94.4
5						129.2	133.6	150	124.4	142.9												141.4	129	140.5	144.5	116.3
6						155	157.3	178.1	147.8	170.8												169.9	152.7	166.4	172.3	140
Figure 3C
	Ctrl																Cck-Tettox
						0	0	0	0	0	0											0	0	0	0	0	0	0
						20.7	23.8	17.5	29.2	33.9	28											24.6	27.1	21	29.2	27.5	23.8	17.8
						40.1	38.3	31.3	47.9	61	49.9											46.2	48.3	36.3	51.9	48.7	41.3	30.9
						60.2	53.9	47.9	65.2	79.7	68											66.7	69.1	54.1	74	68.1	59.3	45.7
						109.7	79	71.4	95	107.2	94											102.6	100.8	76.6	107.9	95.6	82.1	68.4
						121.6	90.9	82.7	108.3	121.2	106.8											118.6	113.8	87.91	123.5	110.9	94.4	80.1
						140.3	109.6	98.1	126.3	140.5	125.5											145.6	134.1	105.9	144.9	126.9	112.2	95.47
Figure 3D
	Ctrl																Cck-Tettox
0			0	0	0	0	0		0.9	1	0.3							0	0	0	0	0		1.6	0.8
1			1.2	1.3	1.4	0.8	2		0.8	2	1.2		1.2	1.3	1.4			1.8	1.1	1.5	2.1	2.6		2.1	2.6		1.8	1.1	1.5
2			3.2	3.4	3	1.4	1.9		1.4	1.9	1.4		3.2	3.4	3			3.3	2.7	3.4	2.5	2.4		2.5	2.4		3.3	2.7	3.4
3			5.1	4.4	3.6	1.1	1.5		1.1	1.5	1.4		5.1	4.4	3.6			5	4.3	4.9	2.6	2.4		2.6	2.4		5	4.3	4.9
4			5.2	5.9	4.7	1.4	1.9		1.4	1.9	2.3		5.2	5.9	4.7			5.6	5.8	7	3.6	3.3		3.6	3.3		5.6	5.8	7
5			5.8	6.4	4.8	1.4	3.1		1.4	3.1	3		5.8	6.4	4.8			5.2	5.6	6.2	4.4	3.9		4.4	3.9		5.2	5.6	6.2
6			6.3	6.6	5.9	2	3.4		2	3.4	3.1		6.3	6.6	5.9			6.2	7.1	7.9	4.2	4		4.2	4		6.2	7.1	7.9
1			5.5	3.5	3.3	4.7	5.1		4.7	5.1	4.5		5.5	3.5	3.3			9.5	8.8	4.4	7.6	3.8		7.6	3.8		9.5	8.8	4.4
2			9.4	5	5.2	7	7.8		7	7.8	6.6		9.4	5	5.2			13.2	14	5.3	10.9	7.7		10.9	7.7		13.2	14	5.3
3			11.7	6	7.3	13.6	11.1		13.6	11.1	8.6		11.7	6	7.3			17.9	19.1	6.5	18.1	11.8		18.1	11.8		17.9	19.1	6.5
4			14.3	7.3	8.6	15	13.1		15	13.1	11.3		14.3	7.3	8.6			20.3	23.2	10.4	21.1	15		21.1	15		20.3	23.2	10.4
5			16	10	10.7	17.3	15.4		17.3	15.4	13		16	10	10.7			23.7	25.1	12.5	23.7	17.9		23.7	17.9		23.7	25.1	12.5
6			17.1	11.8	11.4	19.7	17.7		19.7	17.7	13.2		17.1	11.8	11.4			26.2	26.3	18	25.3	21.7		25.3	21.7		26.2	26.3	18
