# Supplementary material for: Multiple NTS neuron populations cumulatively suppress food intake
Source: eLife. 2023 Dec 7;12:e85640. doi: 10.7554/eLife.85640 (PMC10781422; doi:10.7554/eLife.85640)
Supplement: Figure 4—source data 1. [file elife-85640-fig4-data1.xlsx]

## Sheet: Sheet1
Figure 4B
		Veh										CNO
0		0	0	0	0	0	0	0	0	0		0	0	0	0	0	0	0	0	0
2		1	0.4	0.5	0.2	0.4	0.4	0.9	0.8	0.3		0.2	0.1	0	0	0.1	0	0	0	0
4		1.7	1	0.7	0.8	1	0.9	1.2	1.5	1		0.7	0.1	0	0	0.2	0.1	0	0	0.1
Figure 4C
		Veh										CNO
0		0	0	0	0	0	0	0	0	0		0	0	0	0	0	0	0	0	0
2		1	1.5	1.1	1	1.5	0.6	1.1	1.6	1.2		1	0.4	0.5	0.4	0	0.1	0.2	0.2	0.6
4		1.7	1.9	1.7	1.5	1.9	1.6	1.6	2.1	1.9		1.7	0.7	0.5	0.4	0	0.1	0.3	0.3	0.7
Figure 4D
		Veh								CNO
0		0	0	0	0	0	0	0		0	0	0	0	0	0	0
1		0.1	0.1	0.1	0.1	0.1	0.1	0.1		0.1	0.3	0.5	0.3	0.1	0.2	0.3
2		1.6	1.3	0.9	1.5	2	1.1	1.2		0.1	0.3	0.5	0.3	0.1	0.2	0.3
4		2.4	1.8	1.6	1.9	2.8	1.6	1.7		0.2	0.4	0.7	0.4	0.2	0.4	0.3
6		3.1	2.1	2.6	2.3	3	2.1	2.1		0.2	0.4	0.9	0.6	0.3	0.7	0.4
Figure 4E	LCK Dq(n=12)													Ctrl (n=8)
1	5.58	5.18	6.46	6.03	4.23	7.37	7.22	3.78	1.69	7.26	8.71	1.98		4.14	4.35	4.05	3.59	3.77	6.55	6.96	1.08
2	4.04	3.81	3.74	5.23	3.41	4.55	7.09	4.84	1.56	5.4	5.05	1.55		3.01	3.77	2.84	3.71	4.54	4.99	5.58	2.08
3	3.76	2.92	2.93	4.15	4.06	4.47	5.11	4.58	1.62	4.5	4.84	2.79		3.38	3.29	2.81	3.29	2.52	3.57	4.55	3.65
4	0.61	0.53	1.03	1.72	0.56	1.9	1.07	0.53	0.22	0.75	1.24	0.16		3.26	3.78	3.66	3.6	3.33	4.47	4.65	3.85
5	0.67	0.47	0.75	2.51	0.64	1.88	2.06	0.76	0.77	1.14	1.38	1.17		4.22	3.33	3.31	4.52	3.25	3.72	4.64	4.62
6	2.07	2.73	4.02	4.89	2.53	3	4.6	3.96	3.87	5.63	6.58	3.13		3.8	3.55	3.49	3.65	3.33	4.05	3.69	3.53
Figure 4F	LCK Dq(n=12)													Ctrl (n=8)
1	1	1	1	1	1	1	1	1	1	1	1	1
2	1.00791	0.997506	0.97445	0.990291	0.983871	0.979955	0.985105	0.988636	0.97541	0.992288	0.984522	0.984309
3	1.02678	1.01895	0.973262	0.989752	1.02535	1.0039	0.987118	0.99053	0.980484	0.989717	0.967535	0.993639
4	1.04991	1.00848	0.964349	0.984358	1.04032	1.01336	0.97182	0.992424	0.983216	0.980536	0.956965	1.00891
5	0.934267	0.880798	0.882353	0.902913	0.922811	0.918151	0.839372	0.875	0.863778	0.865589	0.853152	0.870653
6	0.839927	0.830424	0.831254	0.882956	0.838134	0.836303	0.791063	0.812027	0.827088	0.825927	0.820687	0.843087
	0.908095	0.903741	0.958408	0.977886	0.852535	0.949332	0.87963	0.9375	0.868852	0.925083	0.90034	0.920271
Figure 4G
		Ctrl										CNO (LCKDq)
		0.882353	1	0.7	0.857143	0.782609	0.9					0.3125	0.8	0.722222	0.411765	0		0.266667
Figure 4H
	Ctrl										CNO (LCKDq)
	0.73913		0.862069	0.916667	0.692308	0.807692					0.1	0.833333	0.464286	0.391304		0.785714	0.0909091
