# Supplementary material for: Multiple NTS neuron populations cumulatively suppress food intake
Source: eLife. 2023 Dec 7;12:e85640. doi: 10.7554/eLife.85640 (PMC10781422; doi:10.7554/eLife.85640)
Supplement: Figure 5—source data 1. [file elife-85640-fig5-data1.xlsx]

## Sheet: Sheet1
Figure 5B
	Ctrl												LCKTettox
0			0	0	0	0	0	0	0	0			0	0	0	0	0	0	0	0
1			28.34	33.63	27.62	26.43	28.83	27.79	28.83	27.79			32.17	34.55	27.02	35.93	35.26	36.66	30.06	28.14
2			54.08	62.45	49.37	50.03	53.3	51.54	53.3	51.6			60.59	59.67	49.71	63.79	65.94	68.25	56.19	51.58
3			79.25	89.29	71.42	74.14	79.05	75.42	79.05	75.42			85.19	86.03	72.45	91.44	93.54	97.24	82.4	75.66
4			105.11	115.12	93.19	97.87	104.38	98.75	104.38	98.75			116.42	111.3	96.6	121.8	130.02	127.79	108.75	99.92
5			132.24	143.83	114.86	122.42	132.31	121.37	132.31	121.37			142.74	140.85	123.04	148.9	160.19	161.89	138.06	128.05
Figure 5C
	Ctrl												LCKTettox
0			0	0		0	0	0					0	0	0	0	0	0	0	0
1			23.55	21.55		23.71	21.71	25.32					36.13	38.38	30.39	36.68	36.17	33.5	31.38	29.38
2			40.93	38.66		42.45	37.07	43.28					64.38	62.07	50.99	62.91	63.63	58.21	54.89	52.1
3			58.66	55.54		59.55	53.12	60.61					92.26	82.45	70.61	88.48	89.52	84.1	75.92	73.45
4			76.89	73.87		76.81	68.17	78.32					118.87	102.91	88.21	110.19	118.52	107.53	95.61	94.08
5			92.55	89.67		90.89	84.71	94.28					150.29	128.28	105.16	131.31	142.57	129.75	115.63	118.08
6			108.32	108.19		106.73	100.87	110.41					178.91	152.37	130.05	156.95	167.42	155.2	139.43	140.79
Figure 5D
	Ctrl										LCKTettox
0			0	0	0	0	0	0			0	0	0	0	0	0	0	0
1			0.93	0.55	1.06	1.67	0.46	0.49			2.2	2.27	3.03	2.32	1.85	1.33	1.15	1.55
2			1	0.8	1.71	1.23	0.6	0.99			3.54	2.85	4.3	2.18	2.25	2.72	2.28	2.68
3			1.28	2.48	2.92	2.57	1.34	1.9			4.04	3.61	5.56	3.99	4.11	3.25	3.55	3.13
4			1.02	2.66	3.93	2.72	1.96	2.48			4.6	3.83	5.67	3.86	3.11	2.19	3.76	3.18
5			2.03	2.99	4.43	3.5	1.91	3.1			5	4.2	6.8	5.17	5.1	5.15	4.12	3.26
6			2.65	3.13	4.98	3.66	2.84	2.81			5.4	5.13	7.23	5.47	4.84	5.14	5.36	4.19
1			2.45	1.59	1.4	3.92	2.56	4.81			8.5	5.67	7.28	8.93	8.95	6.08	5.9	4.73
2			2.95	2.57	2.32	6.36	2.56	6.59			12.3	6.07	9.77	12.23	13.21	8.56	8.04	6.91
3			5.76	4.29	4.64	8.36	3.91	8.54			17.6	8.43	12.42	17.26	16.76	12.89	10.63	10.13
4			6.82	6.33	7.79	10.32	4.39	10.68			20.68	10.11	13.15	17.55	20.73	14.12	10.76	11.6
5			8.15	7.54	10.65	10.66	6.04	11.91			25.3	14.53	14.25	19.49	22.88	16.48	12.7	14.73
6			9.33	9.42	11.57	12.64	7.69	12.91			26.44	17.1	19.22	21.98	24.16	18.56	15.39	16.36
Figure 5E
	CCKTettox													LCTettox													LCKTettox
0			0	0	0	0	0	0	0								0	0	0	0	0						0	0	0	0	0	0	0	0
1			24.6	27.1	21	29.2	27.5	23.8	17.8								24.1	24.1	24.1	24.1	24.1						36.13	38.38	30.39	36.68	36.17	33.5	31.38	29.38
2			46.2	48.3	36.3	51.9	48.7	41.3	30.9								71.4	54.2	42	61.2	56.3						64.38	62.07	50.99	62.91	63.63	58.21	54.89	52.1
3			66.7	69.1	54.1	74	68.1	59.3	45.7								92.4	74.5	59.6	85.1	73.5						92.26	82.45	70.61	88.48	89.52	84.1	75.92	73.45
4			102.6	100.8	76.6	107.9	95.6	82.1	68.4								113.6	91.3	74.3	105.2	90.9						118.87	102.91	88.21	110.19	118.52	107.53	95.61	94.08
5			118.6	113.8	87.91	123.5	110.9	94.4	80.1								153	104	91.6	128	115.9						150.29	128.28	105.16	131.31	142.57	129.75	115.63	118.08
6			145.6	134.1	105.9	144.9	126.9	112.2	95.47								176.3	128.4	111.8	151.7	138.3						178.91	152.37	130.05	156.95	167.42	155.2	139.43	140.79
Figure 5F
	CCKTettox													LCTettox													LCKTettox
0			1	1	1	1	1	1	1	1	1					1		1	1	1	1	1	1				1	1	1	1	1	1	1	1
1			1.11111	1.27397	1.02203	1.10748	1.27615	1.28992	1.09746	1.08607	1.03556					1.36596		1.12054	1.26582	1.15668	1.21642	0.980469	1.28626				1.32075	1.21616	1.29438	1.35199	1.33222	1.22239	1.21884	1.19799
2			1.21778	1.39269	1.00881	1.09813	1.40586	1.40756	1.14407	1.07377	1.03556					1.4766		1.15625	1.38608	1.2212	1.36194	1.07812	1.30916				1.46415	1.23141	1.39507	1.48206	1.49035	1.31309	1.29822	1.28924
3			1.28889	1.55251	1.20264	1.24299	1.58159	1.51681	1.25	1.13525	1.08					1.63404		1.23661	1.5	1.24885	1.39925	1.25391	1.39313				1.66415	1.32139	1.50222	1.68033	1.62212	1.47147	1.39429	1.42403
4			1.53333	1.75799	1.30837	1.3271	1.80335	1.65546	1.3178	1.2459	1.18667					1.65532		1.26786	1.55063	1.35484	1.38806	1.29688	1.51145				1.78038	1.38544	1.53174	1.69176	1.76949	1.51646	1.39911	1.48556
5			1.66667	1.80822	1.37445	1.35514	1.86193	1.7563	1.38136	1.32377	1.29333					1.54043		1.31696	1.6424	1.52074	1.59702	1.55078	1.72519				1.95472	1.55395	1.57622	1.76823	1.84929	1.60278	1.47107	1.61658
6			1.80889	1.89041	1.46696	1.43925	1.90795	1.78151	1.44491	1.38115	1.29778					1.78298		1.375	1.68354	1.64977	1.73134	1.77734	1.93511				1.99774	1.65193	1.77719	1.86638	1.89681	1.67886	1.57085	1.68481
