# Supplementary material for: Multiple NTS neuron populations cumulatively suppress food intake
Source: eLife. 2023 Dec 7;12:e85640. doi: 10.7554/eLife.85640 (PMC10781422; doi:10.7554/eLife.85640)
Supplement: Figure 6—figure supplement 2—source data 1. [file elife-85640-fig6-figsupp2-data1.xlsx]

## Sheet: Sheet1
Figure 6- figure supplement 2A
	Ctrl Sham												Ctrl VSG														TT Sham											LCKTetTox VSG
0		43.22	47.38				24.57	26.19	40.66	31.54	46.03	47.45		31.79	37.4		47.77		36.46	39.62	45.46	33.38	34.76	44.97				47.31			32.14	39.95	47.66	52.83	51.02	49.1		53.4		47.11	42.69	42.12		45.62			42.07
1		42.9	46.88				23.45	25.89	40.32	30.96	44.75	48.05		31.52	37.15		49.14		35.76	39.47	45.77	32.94	35.96	44.99				47.73			30.9	39.64	47.54	51.66	51.32	49.56		49.55		48.67	42.84	42.72		45.83			42.84
2		40.84	45.06				22.7	24.94	37.6	28.84	42.35	44.16		29.61	34.7		44.95		33.24	36.5	42.05	30.4	33.96	42.96				45.14			29.2	37.15	43.61	48.79	49.88	42.23		46.97		45.08	39.5	39.7		44.12			39.8
3		37.91	42.72				22.56	24.72	35.31	27.1	40.56	43.13		28.27	33.39		42.4		31.8	34.4	40.19	29.26	31.31	41.56				43.37			27.76	35.36	42.04	47.22	48.86	45.77		44.15		41.13	37.58	37.21		43.1			35.2
4		38.49	42.56				24.21	26.6	36.34	28.84	40.56	43.8		28.25	32.7		40.79		32.27	33.8	39.62	28.08	31.19	41.21				41.72			28.46	36.08	42.06	48.53	50.54	45.78		43.18		41.61	37.18	35.4		40.62			34.82
5		39.03	43.55				23.85	27.05	37.63	29.81	41.33	44.62		27.23	31.37		39.27		32.68	33.24	39.84	27.62	30.98	46.33				41.45			28.88	36.99	41.71	50.87	50.45	46.33		42.72		40.42	37.05	34.57		39.67			33.77
6		40.31	44.31				24.2	26.83	38.25	30.19	41.56	44.57		26.87	28.96		38.93		32.21	32.87	40.39	26.9	30.99	40.36				42.1			30.26	37.65	41.85	49.61	50.07	46.41		42.9		40.92	36.78	33.64		38.21			33.36
7		40.55	44.98				24.01	26.27	38.52	31.78	41.95	44.31		25.41	28.53		39.15		32.09	32.68	40.86	26.79	31.25	40.73				43.15			29.84	37.73	41.68	49.83	50.7	48.13		43.19		39.92	36.73	33.56		36.79			33
8
9
10
11
12
13
14		45.65	49.46				24.3	27.34	41.84	35.48	44.32	45.38		26.79	29.33		43.75		33.73	31.98	41.82	26.47	31.61	41.54				48.25			32.33	42.79	43.01	51.23	51.97	49.45		45.01		36.77	37.77	32.18		34.53			33.76
15
16
17
18
19
20
21		46.21	50.22				25.4	28.64	45.25	39.18	47.25	49.5		28.57	31.01		45.04		36.5	33.66	44.14	28.88	32.44	41.57				48.2			34.3	48.41	48.74	52.84	52.64	52.46		49.26		40.43	41.05	32.57		35.85			34.21
22
23
24
25
26
27
28		48.59	51.37				25.17	29.48	47.3	41.15	48.92	51.29		30.82	34.56		48.57		40.27	36.53	47.43	30.93	34.34	46.08				51.28			37.25	52.43	52.43	53.23	54.55	52.89		52.2		45.72	46.27	33.83		40.6			35.86
29
30
31
32
33
34
35		51.33	52.77				25.68	29.64	47.6	41.13	48.32	52.04		31.2	35.8		53.28		40.84	37.4	49.82	31.72	33.82	46.09				52.01			38.5	52.88	53.67	53.92	53.73	53.26		53.5		51.5	51	35.9		44.91			36.79
Figure 6- figure supplement 2B
	Ctrl Sham																							Ctrl VSG																							TT Sham
0												100	100				100	100	100	100	100	100						100	100				100								100	100	100	100	100	100		100
1												99.26	98.94				95.44	98.85	99.16	98.16	97.22	101.26						99.15	99.33				102.87								98.08	99.62	100.68	98.68	103.45	100.04		100.89
2												94.49	95.1				92.39	95.23	92.47	91.44	92.01	93.07						93.14	92.78				94.1								91.17	92.13	92.5	91.07	97.7	95.53		95.41
3												87.71	90.16				91.82	94.39	86.84	85.92	88.12	90.9						88.93	89.28				88.76								87.22	86.82	88.41	87.66	90.07	92.42		91.67
4												89.06	89.83				98.53	101.57	89.38	91.44	88.12	92.31						88.86	87.43				85.39								88.51	85.31	87.15	84.12	89.73	91.64		88.18
5												90.31	91.92				97.07	103.28	92.55	94.51	89.79	94.04						85.66	83.88				82.21								89.63	83.9	87.64	82.74	89.13	103.02		87.61
6												93.27	93.52				98.49	102.44	94.07	95.72	90.29	93.93						84.52	77.43				81.49								88.34	82.96	88.85	80.59	89.15	89.75		88.99
7												93.82	94.93				97.72	100.31	94.74	100.76	91.14	93.38						79.93	76.28				81.96								88.01	82.48	89.88	80.26	89.9	90.57		91.21
8
9
10
11
12
13
14												105.62	104.39				98.9	104.39	102.9	112.49	96.29	95.64						84.27	78.42				91.58								92.51	80.72	91.99	79.3	90.94	92.37		101.99
15
16
17
18
19
20
21												106.92	105.99				103.38	109.35	111.29	124.22	102.65	104.32						89.87	82.91				94.29								100.11	84.96	97.1	86.52	93.33	92.44		101.88
22
23
24
25
26
27
28												112.42	108.42				102.44	112.56	116.33	130.47	106.28	108.09						96.95	92.41				101.67								110.45	92.2	104.33	92.66	98.79	102.47		108.39
29
30
31
32
33
34
35												118.76	111.38				104.52	113.17	117.07	130.41	104.98	109.67						98.14	95.72				111.53								112.01	94.4	109.59	95.03	97.3	102.49		109.93
Figure 6- figure supplement 2C
Ctrl	LCKTetTox	Ctrl	LCKTetTox
12.13	22.31	19.48	26.24
	22.8		23.63
10.9	19.26	19.92	22.11
15.74	19.16	20.87	21.32
17.58	21.84	25.22	24.66
21.52	19.96	25.39
	16.59		25.02
23.78		23.47
3.05	11.11		24
	10.88	18.71
4.42	15.29		19.07
8.39	20.51	19.66
16.1		20.88
13.81	16.28	22.95	21.5
10.31	20.68	21.25	23.53
15.11		19.2	25.3
18.93	21.77	21.79
16.66	21.49	25.15	25.61
19.69		26.12	28.07
10.44		25.52
12.35		21.39	27.49
17.28		20.6	25.22
		26.85
Figure 6- figure supplement 2D
	Ctrl Sham																						Ctrl VSG																						TT Sham
Fast Mass												20.47	21.88				4.36	5.44	19.94	17.42	20	21.24		7.6	9.83		25.62						15.74	12.05	18.9	7.14	9.22	16.14							22.37		15.34	20.9	22.78
Lean Mass												26.65	25.88				18.8	21.23	24.8	20.43	25.45	26.78		20.42	22.3		23.81						22.64	22.48	26.53	21.54	21.41	26.64							24.49		19.96	27.19	27.4
Figure 6- figure supplement 2E
	Ctrl Sham																						Ctrl VSG																						TT Sham
Fast Mass												2.89	0.36				1.31	1.02	3.84	7.11	1.07	1.55		-3.3	-5.91		1.84						1.93	-3.06	2.24	-3.3	-3.13	-1.14							0.53		4.23	5.61	2.27
Lean Mass												1.43	0.49				0.09	1.57	1.85	1.23	0.3	1.26		0.5	1.43		0.34						1.39	0.69	0.41	0.15	0.81	-0.21							-0.17		0.89	3.66	2.1
Figure 6- figure supplement 2F
	Ctrl Sham												Ctrl VSG												LCKTetTox Sham												LCKTetTox VSG
Sham	8.55	10.06	5.39	8.5	11.82		8.35	12.45					11.45	10.04	10.24	13.02	10.69	9.42	10.24		8.95				11.76	14.18	10.3	11.68	12.28	14.87		12.57					10.37	14.86		9.18		13.49
Figure 6- figure supplement 2G
Ctrl Sham												Ctrl VSG												LCKTetTox Sham												LCKTetTox VSG
0.710754	0.665898	0.867602	0.849851	0.744547	1.10735		1.25911	0.843067				0.671681	0.6465	1.12032	0.841912	0.589908	0.845583		1.14004					0.964585	0.91609	1.16983	0.971445	1.32856		0.796768						0.910743	1.1502	0.742851					0.727963
Figure 6- figure supplement 2H
Ctrl Sham												Ctrl VSG												LCKTetTox Sham												LCKTetTox VSG
1.51088	1.50692	1.5109	1.50381		1.57707	1.576	1.50067	1.52442	1.46942	1.55993		1.47888	1.4764		1.55671	1.53571	1.52378	1.54933	1.52213	1.49061				1.56171		1.51931	1.54074	1.54245	1.51825	1.56027						1.55802	1.56713		1.53501	1.52465	1.50388
Figure 6- figure supplement 2I
	Ctrl Sham																		Ctrl VSG																		LCKTetTox Sham
Fed												3.5755	4.33	3.364	1.658	2.762	2.305		4.9305					4.987	5.262	4.516	3.039	8.058	6.9215								3.178	3.433	1.9575	1.256	2.515	5.2485
Figure 6- figure supplement 2J
	Ctrl Sham																							Ctrl VSG																							LCKTetTox Sham
Fast												168.7	190.7				158.8	151.6	183.7	161.3	185.1	165.5			162	179		258.3				207.4	140.3	171.9	108	162.1	157.6										166.2		177.4
Figure 6- figure supplement 2K
		Ctrl/Sham																							Ctrl/VSG																							TT/Sham
0													199.7	254.2				182.8	154.4	200.9	150.9	174.3	158.7			176.1	152.5		232.4						212.4	137.5	186	151.1	148.6	140.6								176.3
15													444	395.5				311.4	217.9	337.2	295.9	299.6	294.4			274.2	310.7		456.9						365.2	326.8	361.1	240.6	318.6	321.3								250.6
30													485.6	449.3				276.5	171.8	341	252.4	320.6	274.3			176.1	120		390.6						245.4	286.7	308.1	168.2	293.4	371.6								228.4
45													450.9	478.2				239.4	186.6	283	225.1	301.5	273.9			214.7	176.3		342.1						222.5	151.6	196.8	133.7	197.8	300								235.5
60													417.2	419.3				238.9	212.5	274.2	221.9	257.8	261.1			221.6	195.6		298.1						184.9	171.1	201.8	160.6	186.6	174.9								216.4
120													265.9	271.5				181	167.9	246.7	188.5	200.9	242.6			158.4	154		216.9						149.4	123.9	193.1	129.3	167.5	165.9								173.6
Figure 6- figure supplement 2L
	Ctrl Sham																							Ctrl VSG																							LCKTetTox Sham
Baseline												5.585	5.608				0.3885	0.926	4.767	3.257	9.429	6.8645			1.9955	2.1265		5.4395				4.5955	2.6295	5.958	0.9075	1.8325	7.4275										4.231		3.367
[truncated: 16 more columns]
