# Supplementary material for: Multiple NTS neuron populations cumulatively suppress food intake
Source: eLife. 2023 Dec 7;12:e85640. doi: 10.7554/eLife.85640 (PMC10781422; doi:10.7554/eLife.85640)
Supplement: Figure 6—figure supplement 3—source data 1. [file elife-85640-fig6-figsupp3-data1.xlsx]

## Sheet: Sheet1
Figure 6- figure supplement 3B
	Ctrl	Refeeding
	0	19.403
	10	17.5676
	16.6667	23.3333
Figure 6- figure supplement 3C
	Ctrl	Refeeding
	1	134
	10	74
	6	180
Figure 6- figure supplement 3E
		Sham				VSG
		33.3333				31.9444
		22.7273				39.2308
		18.1818				35.0993
Figure 6- figure supplement 3F
		Sham				VSG
		51				72
		44				130
		55				151
