# Supplementary material for: Multiple NTS neuron populations cumulatively suppress food intake
Source: eLife. 2023 Dec 7;12:e85640. doi: 10.7554/eLife.85640 (PMC10781422; doi:10.7554/eLife.85640)
Supplement: Figure 6—source data 1. [file elife-85640-fig6-data1.xlsx]

## Sheet: Sheet1
	Ctrl						Lepr						CCK						Calcr						LC						LCK
							A0909	Y0574	Z0197	Z0251	Z0252	Z0430	CCK1	CCK2	CCK3	CCK4			calcr1	calcr2	calcr3	calcr4			A0905	A0906	A0908	A0909	A0910		C0554	C0557	C0560	C0561	C0562	C0563
Fig 6C AP	4	2	1	1	0		1	1	11	5	8	4	19	23	24	25			20	33	27	46			78	58	66	35	48		105	76	142	72	60	85
Fig 6D NTS	8	8	6	3	6		67	76	100	102	106	67	82	79	80	96			99	100	58	116			182	120	191	130	135		230	199	200	208	212	205
Fig 6E PBN	14	11	10	6	9		30	60	61	41	46	25	140	120	100	100			55	82	81	45			112	119	158	75	102		180	170	220	200	160	170
